# Supplementary material for: Development of Adenovirus Containing Liposomes Produced by Extrusion vs. Homogenization: A Comparison for Scale-Up Purposes
Source: MDPI journal article supplement (doi:10.3390/bioengineering9110620), 2022-10-27
Supplement: s1 [file s1]

*Article*

# Development of Adenovirus Containing Liposomes Produced by Extrusion vs Homogenization: A Comparison for Scale-up Purposes

Jaimin R. Shah <sup>1,2,3</sup>, Tao Dong <sup>1,2,4</sup>, Abraham T. Phung <sup>1,2,4</sup>, Tony Reid <sup>5</sup>, Christopher Larson <sup>5</sup>, Ana B. Sanchez <sup>5</sup>, Bryan Oronsky <sup>5</sup>, Sarah L. Blair <sup>1,6</sup>, Omonigho Aisagbonhi <sup>1,7</sup>, William C. Trogler <sup>2</sup> and Andrew C. Kummel <sup>2,\*</sup>

<sup>1</sup> Moores Cancer Center, University of California San Diego, La Jolla, 92037

<sup>2</sup> Department of Chemistry and Biochemistry, University of California San Diego, La Jolla, 92093

<sup>3</sup> Materials Science and Engineering, University of California San Diego, La Jolla, 92093

<sup>4</sup> Department of NanoEngineering, University of California San Diego, La Jolla, 92093

<sup>5</sup> EpicentRx, Inc., La Jolla, 92037

<sup>6</sup> Department of Surgery, University of California San Diego, La Jolla, 92037

<sup>7</sup> Department of Pathology, University of California San Diego, La Jolla, 92037

\* Correspondence: akummel@ucsd.edu

## Supplementary Materials

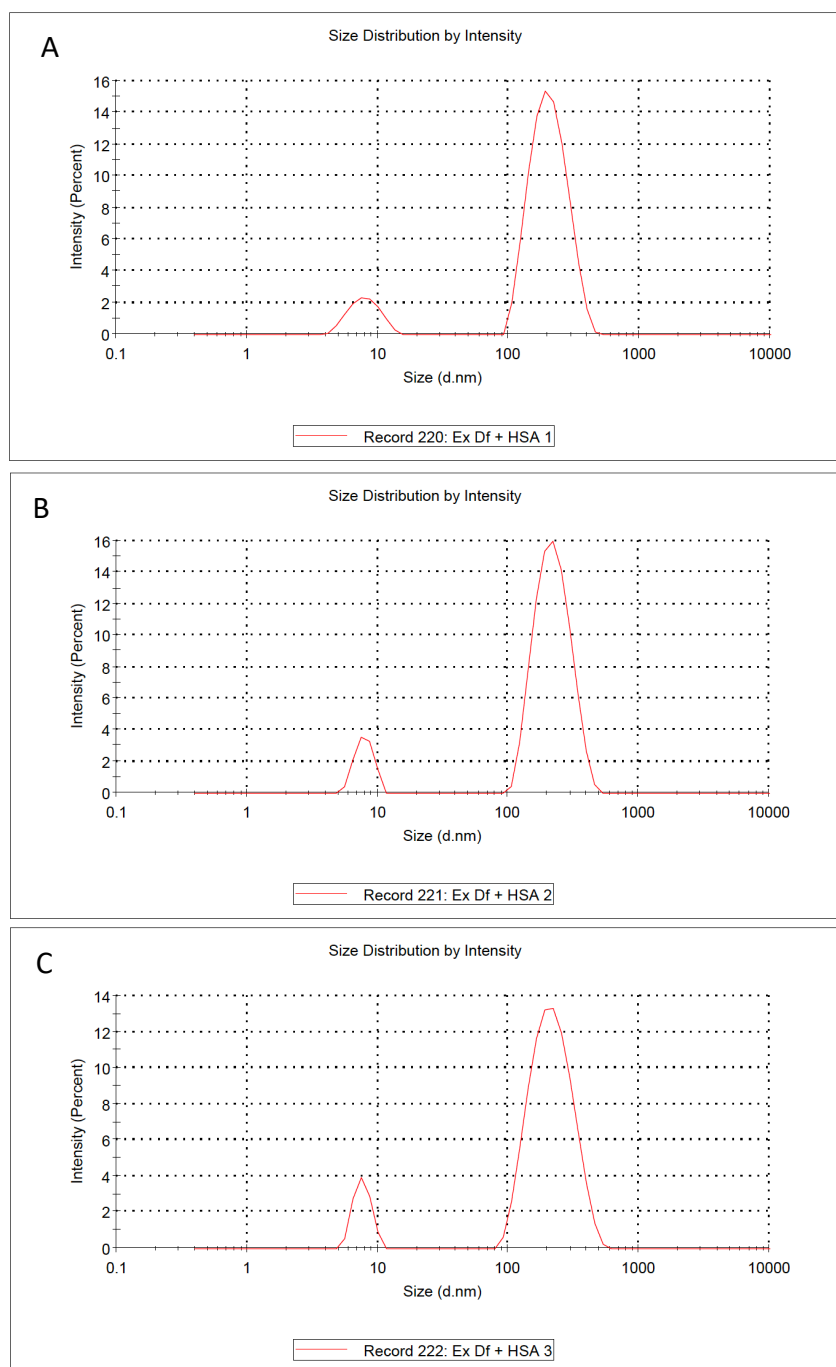

Figure S1: Size distribution by intensity- F14 Ex Df (Empty liposomes) **(A)** Sample 1 Z-Average = 121.0 nm **(B)** Sample 2 Z-Average = 123.8 nm **(C)** Sample 3 Z-Average = 113.5 nm

## Supplementary Materials

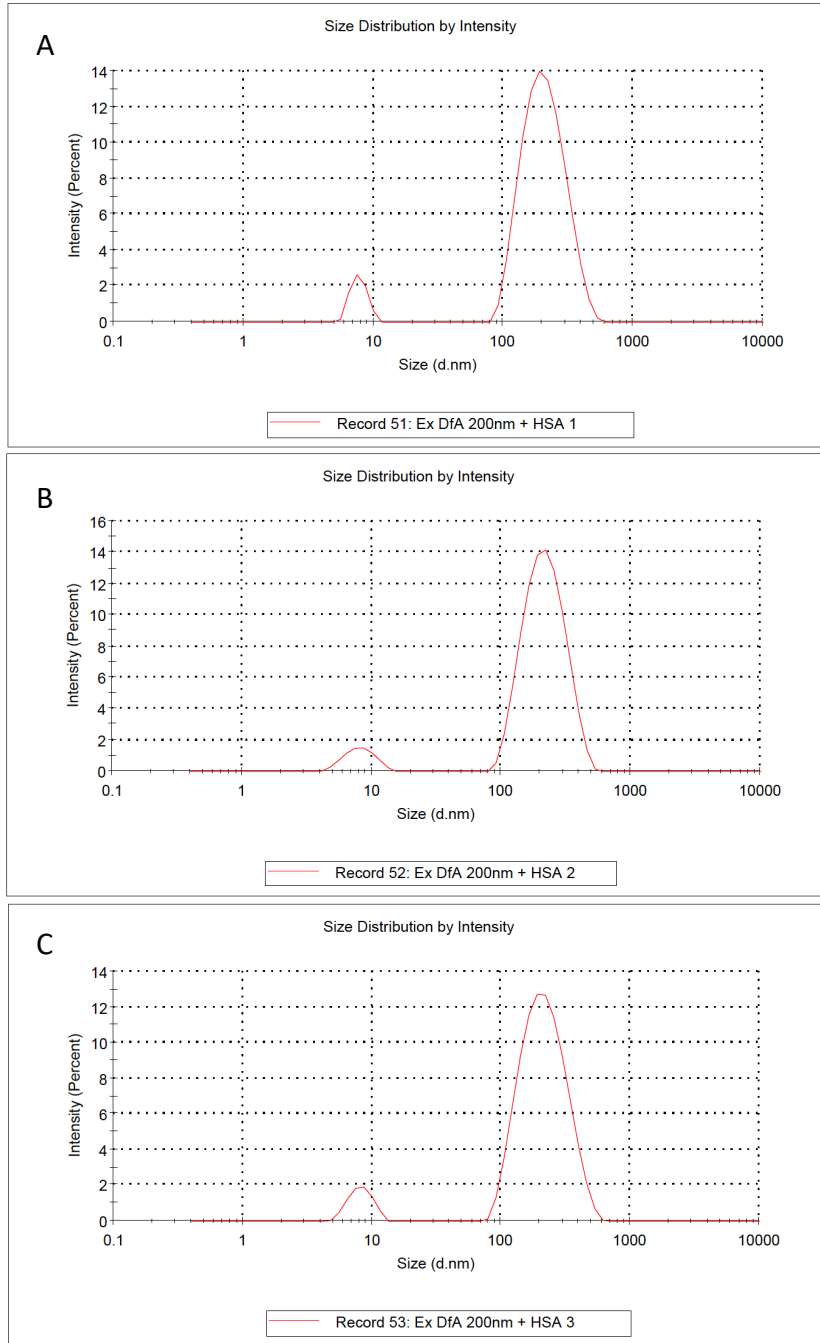

Figure S2: Size distribution by intensity- F14 Ex Df+GFPAd (A) Sample 1 Z-Average = 139.2 nm (B) Sample 2 Z-Average = 140.8 nm (C) Sample 3 Z-Average = 141.5 nm

## Supplementary Materials

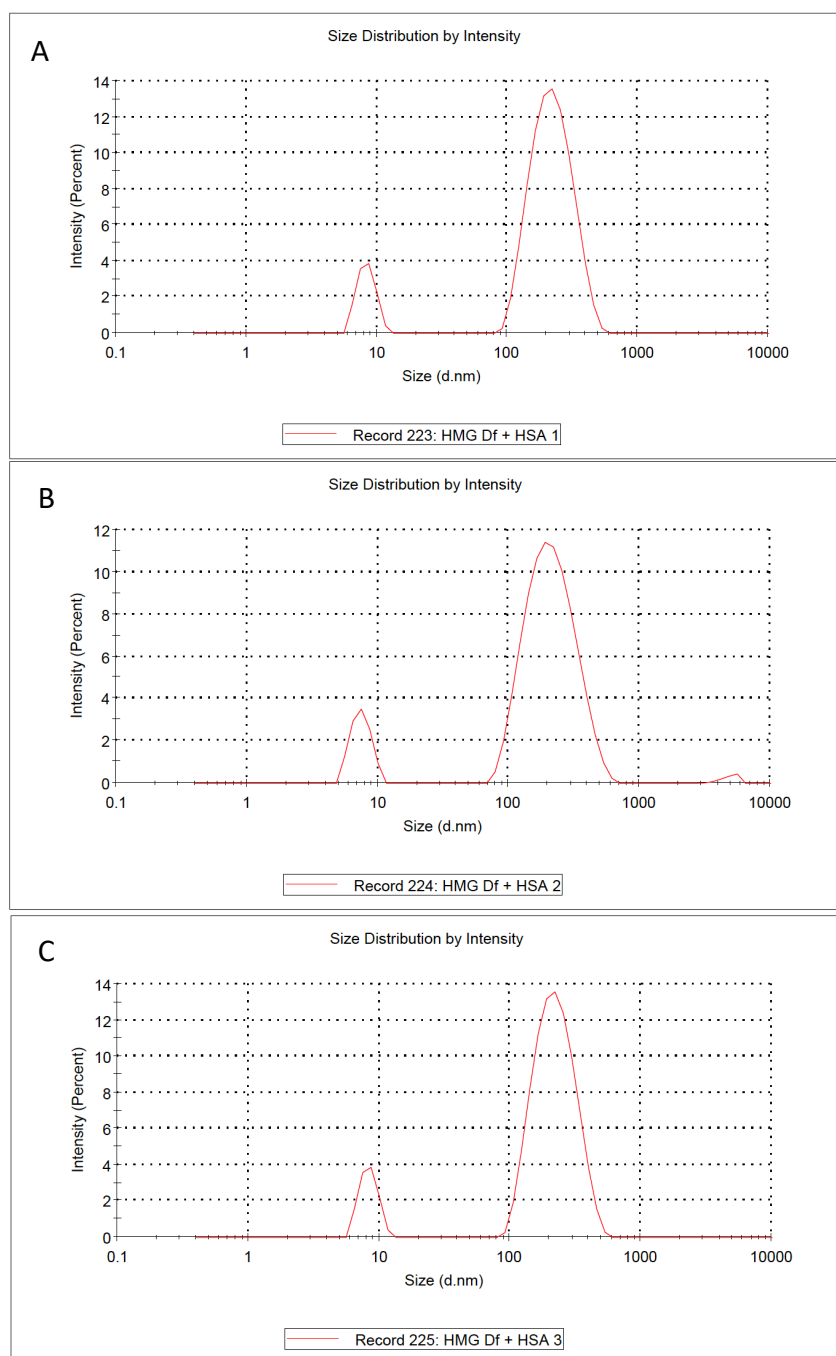

Figure S3: Size distribution by intensity- F14 HMG Df (Empty liposomes) (A) Sample 1 Z-Average = 112.4 nm (B) Sample 2 Z-Average = 112.3 nm (C) Sample 3 Z-Average = 114.2 nm

## Supplementary Materials

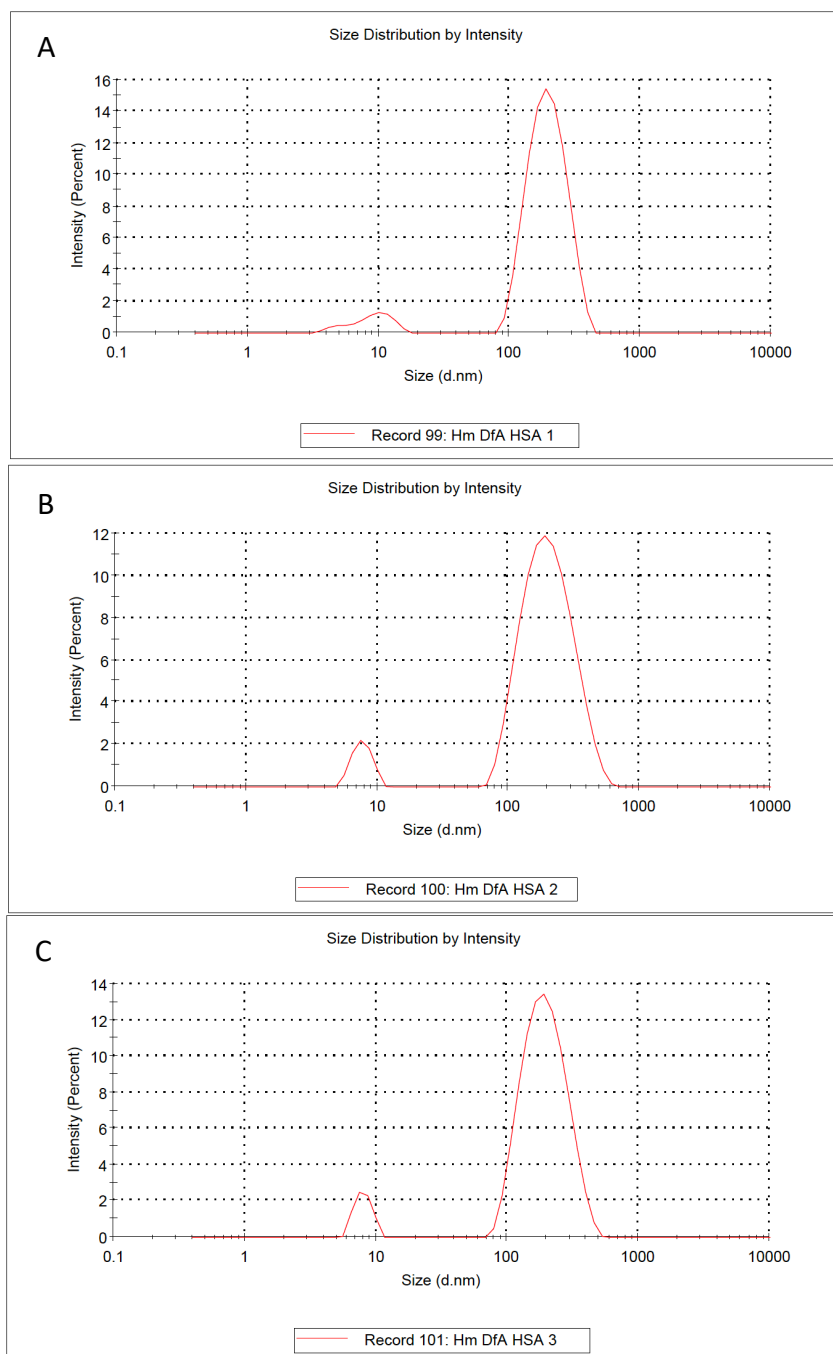

Figure S4: Size distribution by intensity- F14 HMG Df+GFPAd (A) Sample 1 Z-Average = 138.2 nm (B) Sample 2 Z-Average = 131.8 nm (C) Sample 3 Z-Average = 137.9 nm

## Supplementary Materials

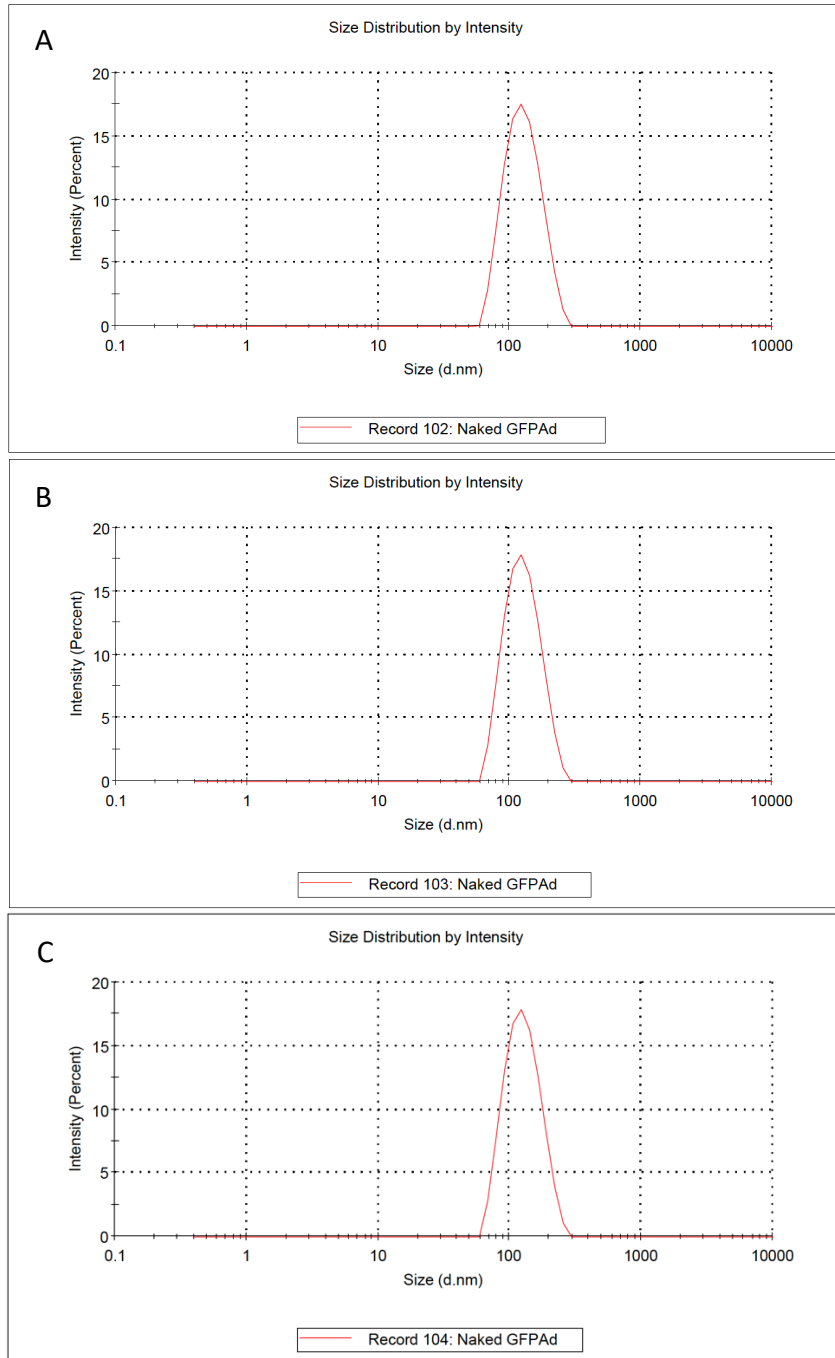

Figure S5: Size distribution by intensity- Unencapsulated GFPAd **(A)** Sample 1 Z-Average = 119.1 nm **(B)** Sample 2 Z-Average = 118.3 nm **(C)** Sample 3 Z-Average = 118.7 nm

## Supplementary Materials

**Table S1.** Particle size (z-average) using DLS, and zeta potential of Ad liposomes manufactured using extrusion process (n = 3).

| Formulation <sup>1</sup> | z-average (nm) | Polydispersity Index (PDI) | Zeta Potential (mV) |
|--------------------------|----------------|----------------------------|---------------------|
| F1 Empty ExDf            | 187 ± 2        | 0.19 ± 0.03                | 2.93 ± 0.38         |
| F1 ExDf+GFPAd            | 193 ± 3        | 0.17 ± 0.03                | -3.32 ± 1.54        |
| F2 Empty ExDf            | 185 ± 5        | 0.18 ± 0.02                | 1.52 ± 0.60         |
| F2 ExDf+GFPAd            | 204 ± 5        | 0.19 ± 0.05                | -1.95 ± 0.48        |
| F3 Empty ExDf            | 768 ± 78       | 0.41 ± 0.06                | -4.83 ± 0.30        |
| F3 ExDf+GFPAd            | 829 ± 78       | 0.40 ± 0.10                | -8.54 ± 1.85        |
| F4 Empty ExDf            | 3069 ± 916     | 0.17 ± 0.19                | 12.7 ± 0.4          |
| F4 ExDf+GFPAd            | 2752 ± 262     | 0.24 ± 0.23                | 12.3 ± 0.6          |
| F5 Empty ExDf            | 302 ± 7        | 0.44 ± 0.01                | 2.78 ± 1.76         |
| F5 ExDf+GFPAd            | 307 ± 20       | 0.43 ± 0.00                | 1.92 ± 0.99         |
| F6 Empty ExDf            | 201 ± 6        | 0.23 ± 0.04                | 4.69 ± 0.33         |
| F6 ExDf+GFPAd            | 208 ± 3        | 0.26 ± 0.03                | 0.38 ± 0.06         |
| F7 Empty ExDf            | 199 ± 4        | 0.19 ± 0.04                | 4.09 ± 0.60         |
| F7 ExDf+GFPAd            | 196 ± 1        | 0.20 ± 0.01                | 0.30 ± 0.12         |
| F8 Empty ExDf            | 194 ± 6        | 0.27 ± 0.03                | -1.14 ± 0.94        |
| F8 ExDf+GFPAd            | 223 ± 8        | 0.25 ± 0.03                | -0.66 ± 0.99        |
| F9 Empty ExDf            | 1223 ± 115     | 0.18 ± 0.16                | 33.8 ± 1.6          |
| F9 ExDf+GFPAd            | 2887 ± 172     | 1.00 ± 0.00                | 36.0 ± 2.3          |
| F10 Empty ExDf           | 249 ± 3        | 0.36 ± 0.03                | 4.55 ± 1.01         |
| F10 ExDf+GFPAd           | 313 ± 10       | 0.22 ± 0.13                | 3.88 ± 0.47         |
| F11 Empty ExDf           | 184 ± 1        | 0.10 ± 0.04                | 7.21 ± 0.69         |
| F11 ExDf+GFPAd           | 179 ± 1        | 0.13 ± 0.02                | 3.47 ± 0.44         |
| F12 Empty ExDf           | 173 ± 1        | 0.21 ± 0.02                | -6.43 ± 2.24        |
| F12 ExDf+GFPAd           | 177 ± 3        | 0.23 ± 0.03                | -8.23 ± 2.21        |
| F13 Empty ExDf           | 162 ± 3        | 0.19 ± 0.04                | -3.82 ± 1.53        |
| F13 ExDf+GFPAd           | 159 ± 4        | 0.17 ± 0.07                | -7.84 ± 0.53        |

<sup>1</sup>In formulations F1 – F4; PEG(1000)-PE carboxylic acid, PEG(2000)-PE carboxylic acid, PEG(5000)-PE carboxylic acid, and PEG(10000)-PE carboxylic acid were used respectively while using PEG(2000)-folate-PE for all formulations. In formulation F5 – F7; PEG(1000)-folate-PE, PEG(3400)-folate-PE, and PEG(5000)-folate-PE were used respectively while using PEG(2000)-PE carboxylic acid for all formulations. In formulation F8 – F13; PEG(2000)-PE carboxylic acid and PEG(2000)-folate-PE were used. In formulations F11 – F13; 10x, 1/4x, and 1/10x lipid amounts were used (compared to the formulation F2) resulting in Ad to DOTAP lipid ratios in the finished product (VP : nmol) 5.17×10<sup>6</sup>, 2.68×10<sup>8</sup>, and 5.17×10<sup>8</sup> respectively.

## Supplementary Materials

**Table S2.** Particle size (z-average) using DLS, and zeta potential of F14 Ad liposomes storage stability (1 month) samples manufactured using extrusion and homogenization processes (n = 3).

| Formulation        | z-average (nm) | Polydispersity Index (PDI) | Zeta Potential (mV) |
|--------------------|----------------|----------------------------|---------------------|
| 4°C ExDf           | 121 ± 6        | 0.72 ± 0.08                | 2.60 ± 0.31         |
| 4°C ExDf +GFPAd    | 122 ± 9        | 0.69 ± 0.11                | -6.03 ± 1.14        |
| -20°C ExDf         | 318 ± 5        | 0.52 ± 0.09                | 1.43 ± 0.66         |
| -20°C ExDf +GFPAd  | 338 ± 17       | 0.56 ± 0.08                | -5.09 ± 1.35        |
| -80°C ExDf         | 521 ± 37       | 0.36 ± 0.03                | 2.20 ± 0.43         |
| -80°C ExDf +GFPAd  | 509 ± 24       | 0.27 ± 0.09                | -5.28 ± 0.65        |
| 4°C HMGDf          | 131 ± 6        | 0.62 ± 0.04                | 3.07 ± 1.37         |
| 4°C HMGDf +GFPAd   | 122 ± 4        | 0.73 ± 0.07                | -4.43 ± 0.09        |
| -20°C HMGDf        | 319 ± 6        | 0.49 ± 0.04                | 2.91 ± 0.19         |
| -20°C HMGDf +GFPAd | 330 ± 24       | 0.47 ± 0.04                | -3.58 ± 0.48        |
| -80°C HMGDf        | 494 ± 74       | 0.37 ± 0.03                | 2.56 ± 0.70         |
| -80°C HMGDf +GFPAd | 504 ± 35       | 0.34 ± 0.06                | -3.49 ± 0.49        |
